# Supplementary material
Source: publisher figshare collection journal article supplement (https://acs.figshare.com/ndownloader/files/4502389)
Supplement: Supplementary file 4 [file 4502389]

# Supporting information for: Kinetic control of intralayer cobalt coordination in layered hydroxides:

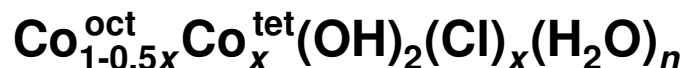

James R. Neilson,<sup>†,‡,¶</sup> Birgit Schwenzer,<sup>‡,¶</sup> Ram Seshadri,<sup>‡,§</sup> and  
Daniel E. Morse<sup>\*,†,‡,¶</sup>

*Biomolecular Science & Engineering, University of California Santa Barbara, CA 93106-9611,*

*Materials Research Laboratory, University of California Santa Barbara, CA 93106-5121,*

*Institute for Collaborative Biotechnologies,*

*University of California Santa Barbara, CA 93106-5100, and*

*Materials Department, University of California Santa Barbara, CA 93106-5050*

E-mail: d\_morse@lifesci.ucsb.edu; Fax: +001-805-893-7998; Phone: +001-805-893-7442.

---

<sup>†</sup> Biomolecular Science & Engineering

<sup>‡</sup> Materials Research Laboratory

<sup>¶</sup> Institute for Collaborative Biotechnologies

<sup>§</sup> Materials Department

# 1 High resolution x-ray photoelectron spectroscopy

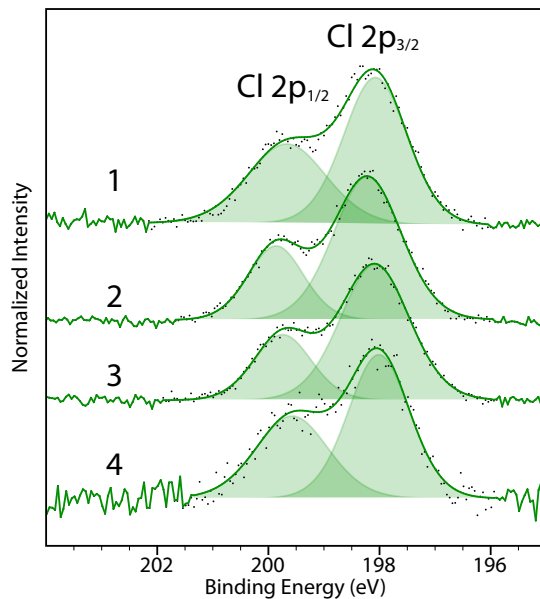

Figure S1: X-ray photoelectron spectra of the Cl  $2p$  core levels of compounds **1-4** illustrating the decomposition of each band ( $2p_{3/2}$  and  $2p_{1/2}$ ) as one distinct chlorine specie

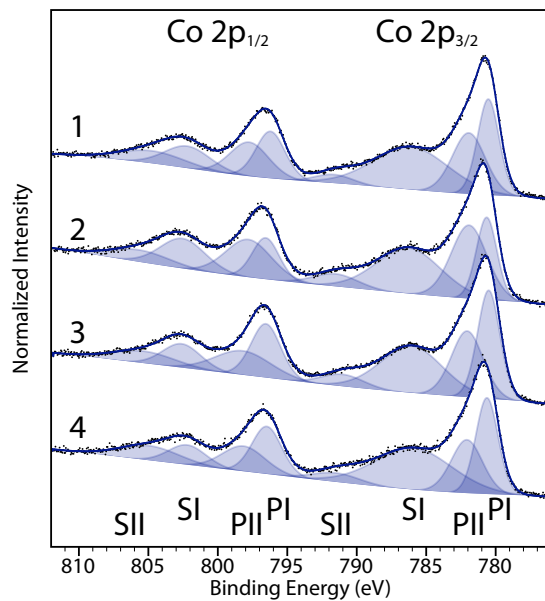

Figure S2: X-ray photoelectron spectra of the Co  $2p$  core levels of compounds **1-4** illustrating the decomposition of each band ( $2p_{3/2}$  and  $2p_{1/2}$ ) into two distinct cobalt species (I,II) consisting of both parent (P) and satellite (S) peaks from each species. Note the pseudo-arbitrarily chosen background subtraction, bringing large error to peak positions and areas.

Table S1: Summary from decomposition of the Co 2*p* core levels of compounds **1-4** with a pseudo-arbitrarily chosen background (see Figure S2).

| Compound | Presumed fraction of Co <sup>tet</sup> (by EDS) | Peak area of species I (Co <sup>oct</sup> ) | Peak area of species II (Co <sup>tet</sup> ) |
|----------|-------------------------------------------------|---------------------------------------------|----------------------------------------------|
| <b>1</b> | 33%                                             | 60.0%                                       | 40.0%                                        |
| <b>2</b> | 40%                                             | 54.0%                                       | 46.0%                                        |
| <b>3</b> | 27%                                             | 59.7%                                       | 40.3%                                        |
| <b>4</b> | 23%                                             | 61.3%                                       | 38.7%                                        |

## 2 Additional structure refinement

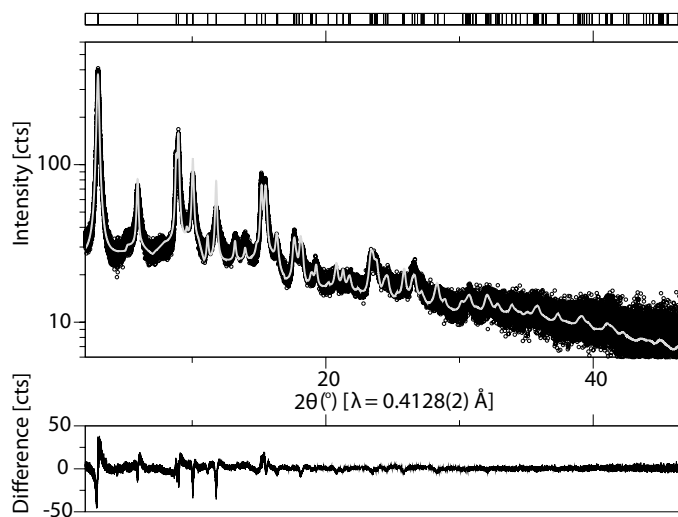

Figure S3: Powder x-ray diffraction (APS, beamline 11-BM at 30 keV) of **4** (black circles) and calculated structure profile (grey line) accompanied by the locations of major diffraction planes (black hashes, top) and difference profile (black line, bottom).

### 3 Elaboration of the partial charge model, as applied

A partial charge model, as described by Livage et al.,<sup>1</sup> is useful for describing the simple behavior of soluble metal complexes in aqueous solutions. This model assumes that a given complex is stable when the partial charges of bound ligands equal the mean electronegativity of the solution, which is highly  $pH$  dependent. Subsequent calculations, based on Allred-Rochow electronegativities, enable prediction of two specific characteristics of soluble metal complexes: the number of associated hydroxyl ligands as a function of  $pH$  and the  $pH$  range of stable complexation by a soluble counteranion.

#### 3.1 Bound hydroxyls as a function of $pH$

For a starting solution of  $CoCl_2$ , which is predominantly formed of cobalt hexaquo complexes,<sup>2,3</sup> the  $pH$  dependent number of bound hydroxyls,  $h$ , is defined by the following reaction:

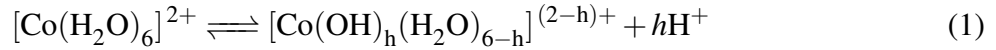

Adapted from Henry et al.,<sup>4</sup> the sum of partial charges,  $\delta_i$ , of each element,  $i$ , in the hydrolyzed complex must match the complex's total charge to satisfy charge neutrality, and is written as:

$$\delta_{Co} + (6 \cdot \delta_O) + [2(6 - h) \cdot \delta_H] = 2 - h \quad (2)$$

The partial charge of a given element is described by the elemental electronegativity,  $\chi_i^0$ , and the mean electronegativity, summed over  $i$  elements in the complex of charge  $z$ :

$$\chi = \frac{\sum_i (\chi_i^0)^{1/2} + 1.36z}{\sum_i (\chi_i^0)^{-1/2}} \quad (3)$$

according to the relationship:

$$\delta_i = \frac{\chi - \chi_i^0}{1.36 (\chi_i^0)^{1/2}} \quad (4)$$

The number of associated hydroxyls is then solved as:

$$h = \frac{2 - \delta_{Co} + 6\delta_O + [(12 - h) \cdot \delta_H]}{1 - \delta_H} \quad (5)$$

This relationship varies with  $pH$  since the mean electronegativity of the hydrolyzed complex,  $\chi_h$ , must follow that of water,  $\chi_h = \chi_{\text{water}} = 2.732 - 0.035 \cdot pH$ .<sup>4</sup> The partial charge of each constituent is also dependent on this relationship by definition of the mean electronegativity, requiring recalculation of  $h$  for each  $pH$ . This relationship is then plotted in Figure 7a to illustrate the  $pH$  ranges at which each subsequent hydrolysis reaction occurs ( $h > 0$ ). This analysis, ignoring the  $Cl^-$  species, is generally accurate under equilibrium conditions, as the equilibrium complex formation constant is low for the anion association reaction:

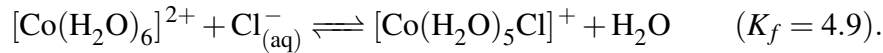

### 3.2 Complexation by anionic species

Since an equilibrium does exist with the counteranion,  $Cl^-$ , the additional reactions involving possible complexing reactions must also be considered, according to the partial charge model:<sup>4</sup>

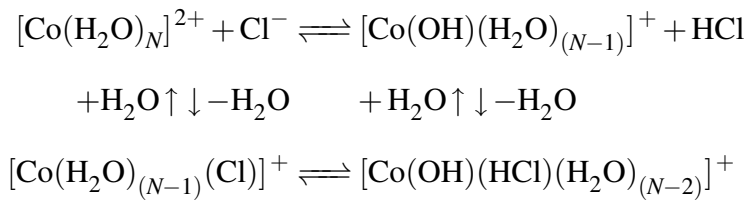

In this equilibrium, there are two pathways for dissociation of the chloride ligand from the cobalt complex with coordination number,  $N$ : anionic (upper left), and hydrolytic (upper right). Prediction of the equilibrium state at a given  $pH$  requires comparison of the mean electronegativity of

the associated complex,  $[\text{Co}(\text{H}_2\text{O})_N(\text{Cl})]^+$  to the mean electronegativity of the  $q$ -protonated form of the chloride anion ( $q = 0$  for  $\text{Cl}^-$ ,  $q = 1$  for  $\text{HCl}$ ). Anionic dissociation occurs when the partial charge of the chloride ligand matches its valancy ( $\delta_{\text{Cl}} \leq -1$ ); this occurs when the  $p\text{H}$  dependent mean electronegativity of the associated complex exceeds the mean electronegativity of  $\text{Cl}_{(\text{aq})}^-$ . Likewise, hydrolytic dissociation occurs when the  $\text{HCl}$  ligand loses a favorable partial charge ( $\delta_{\text{HCl}} \geq 0$ ) and the mean electronegativity of the associated complex,  $[\text{Co}(\text{OH})(\text{HCl})(\text{H}_2\text{O})_{N-2}]^+$ , matches the mean electronegativity of the protonated anion ( $q = 1$ ),  $\text{HCl}$ .

A facile method for tracking the  $p\text{H}$  dependence involves location of these boundary conditions in a graph in which the mean anion electronegativity,  $\chi_q$ , is plotted versus  $p\text{H}$  (Figure 7b,c).<sup>4</sup> The formula describing this relationship is:

$$2.732 - 0.035 \cdot p\text{H} = \frac{\chi_q (\Delta + 5.732 + 2.064q) - 4.071 (3.507 + 2.064q)}{\Delta + (1.408 + 0.507q) \chi_q - (3.507 + 2.064q)} \quad (6)$$

where  $q$  is the protonation state of the anion and

$$\Delta = 2 - 2.225N - \left[ \frac{(4.71 - \chi_{\text{Co}}^0)}{(1.36 (\chi_{\text{Co}}^0)^{1/2})} \right]. \quad (7)$$

Grey boxes in Figure 7b and c outline the boundary conditions mentioned above. The calculated mean electronegativities, Eqn. (3), for  $\text{Cl}_{(\text{aq})}^-$  and  $\text{HCl}$  are 2.39 and 2.44, respectively. The remaining variable,  $N$ , is the coordination number of the complex. When  $N = 4$ , as for tetrahedral coordination (Figure 7b), chloride can associate with cobalt in the range,  $3.8 < p\text{H} < 8.9$ . The octahedrally coordinated complex,  $N = 6$  (Figure 7c), has a narrower range of  $p\text{H}$  stability, from 5.3 to 9.1. Precipitation of a solid in either of these ranges can result in formation of a salt structure.<sup>4</sup> Since precipitation is likely to occur at a  $p\text{H}$  of  $\sim 4.3$ , as shown in Figure 7a described by Eqn. (5), the model predicts that the resulting solid contains some tetrahedral cobalt-chloride complexes rather than all octahedral cobalt complexes.

## References

- (1) Livage, J.; Henry, M.; Sanchez, C. *Prog. Solid State Chem.* **1988**, *18*, 259–341.
- (2) Lever, A. B. P. *Inorganic electronic spectroscopy*; Elsevier, 1968.
- (3) Atkins, P.; Overton, T.; Rourke, J.; Weller, M.; Armstrong, F. *Inorganic Chemistry: Shriver & Atkins*, 4th ed.; Oxford University Press, 2006.
- (4) Henry, M.; Jolivet, J.-P.; Livage, J. Aqueous chemistry of metal cations: Hydrolysis, condensation and complexation. In *Chemistry, Spectroscopy and Applications of Sol-Gel Glasses*; Springer Berlin, 1992; Vol. 77, pp 153–206.
