# Supplementary material
Source: publisher figshare collection journal article supplement (https://acs.figshare.com/ndownloader/files/4502389)

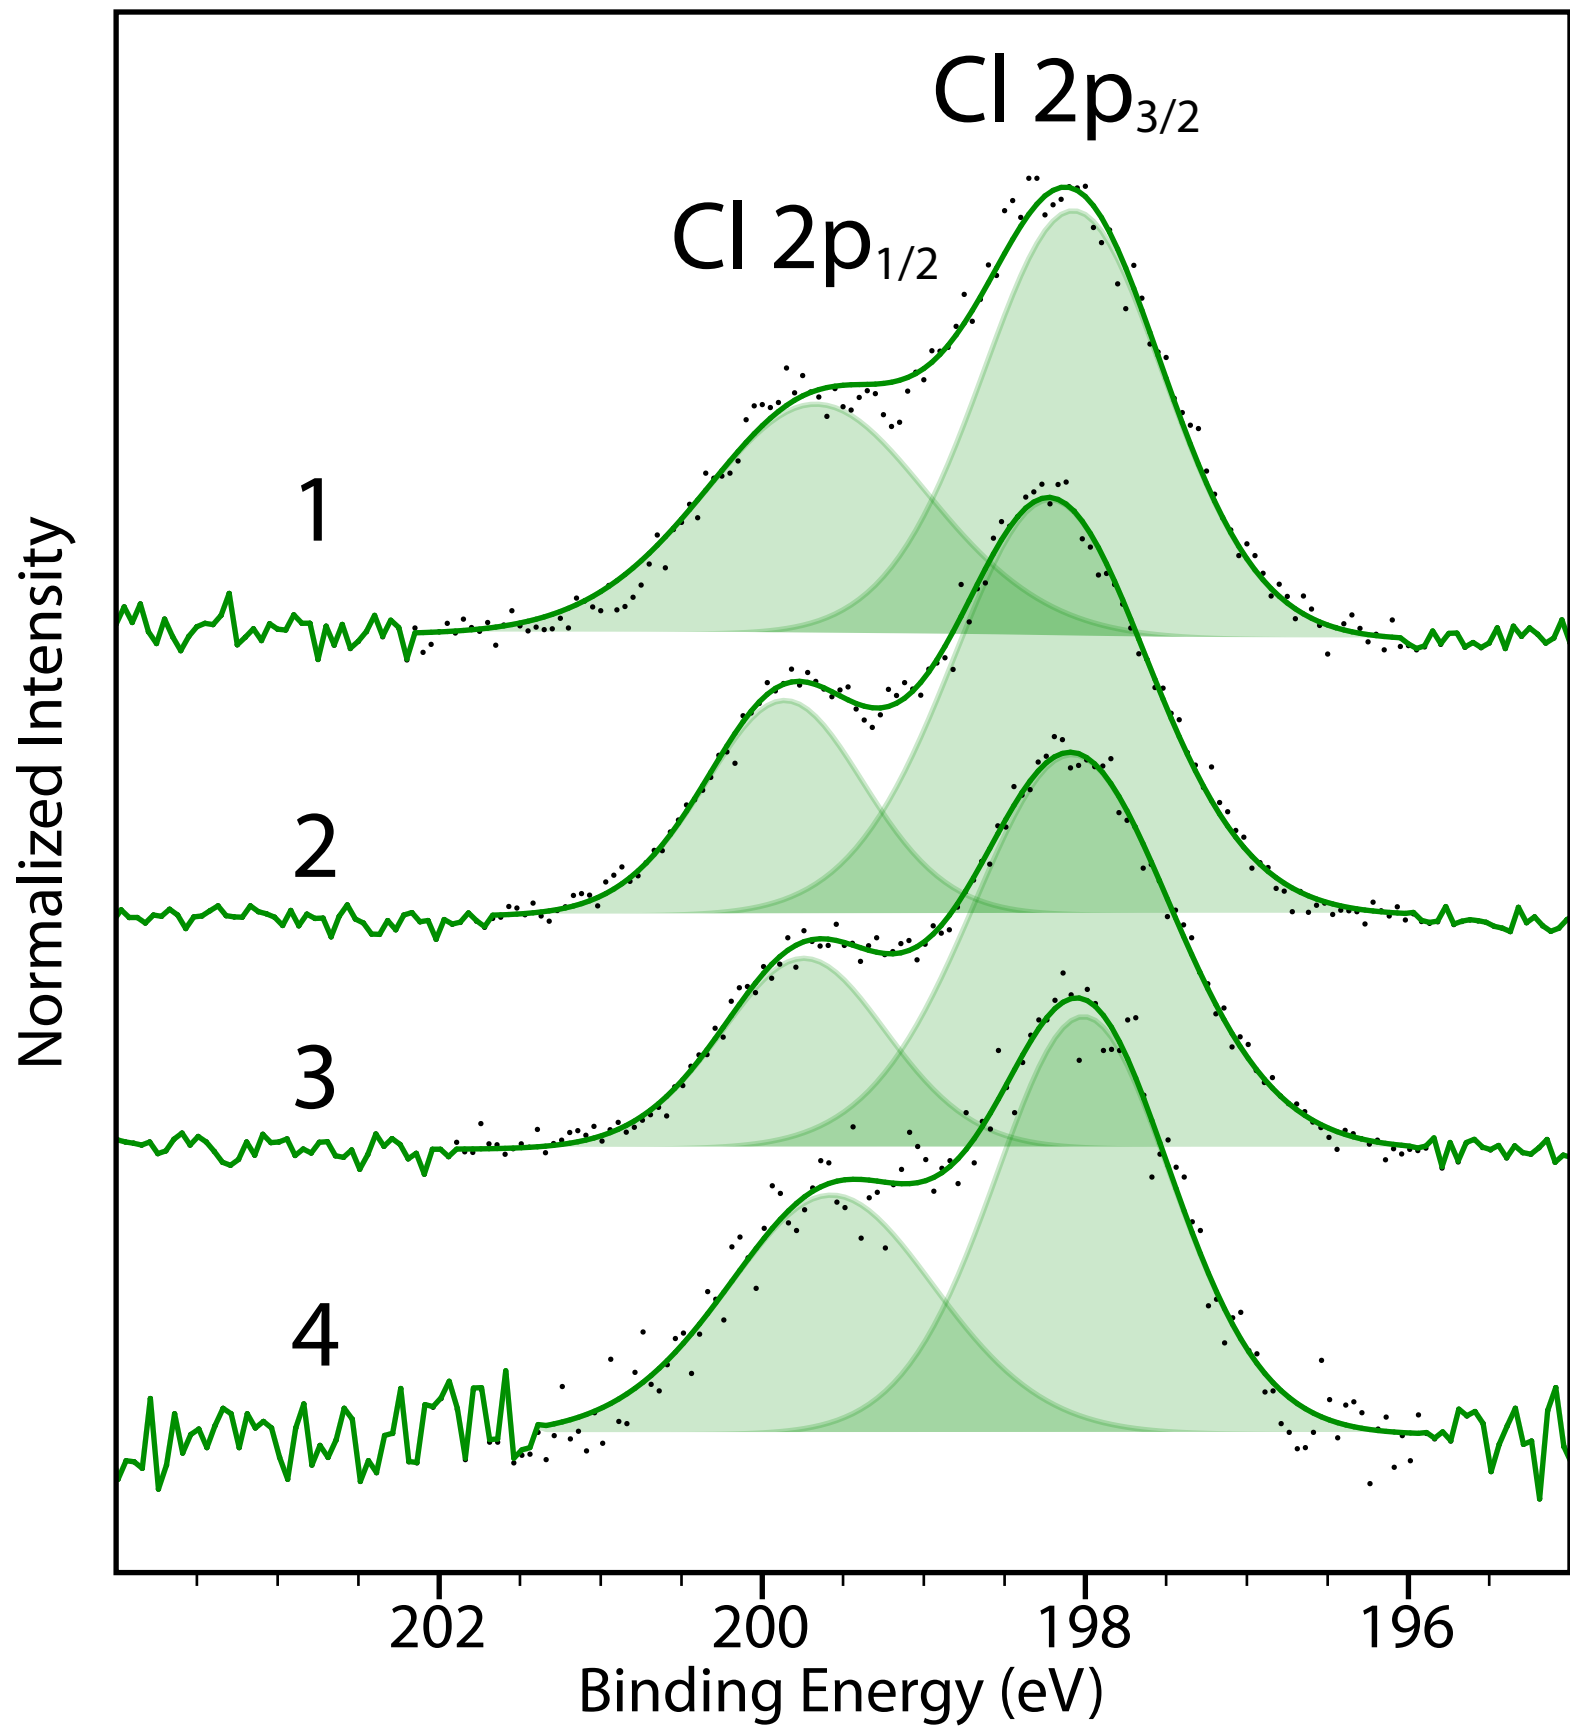

Supplement: Supplementary file 1 [file 4502389]

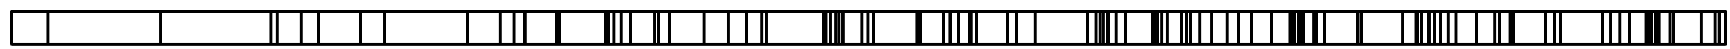

Intensity [cts]

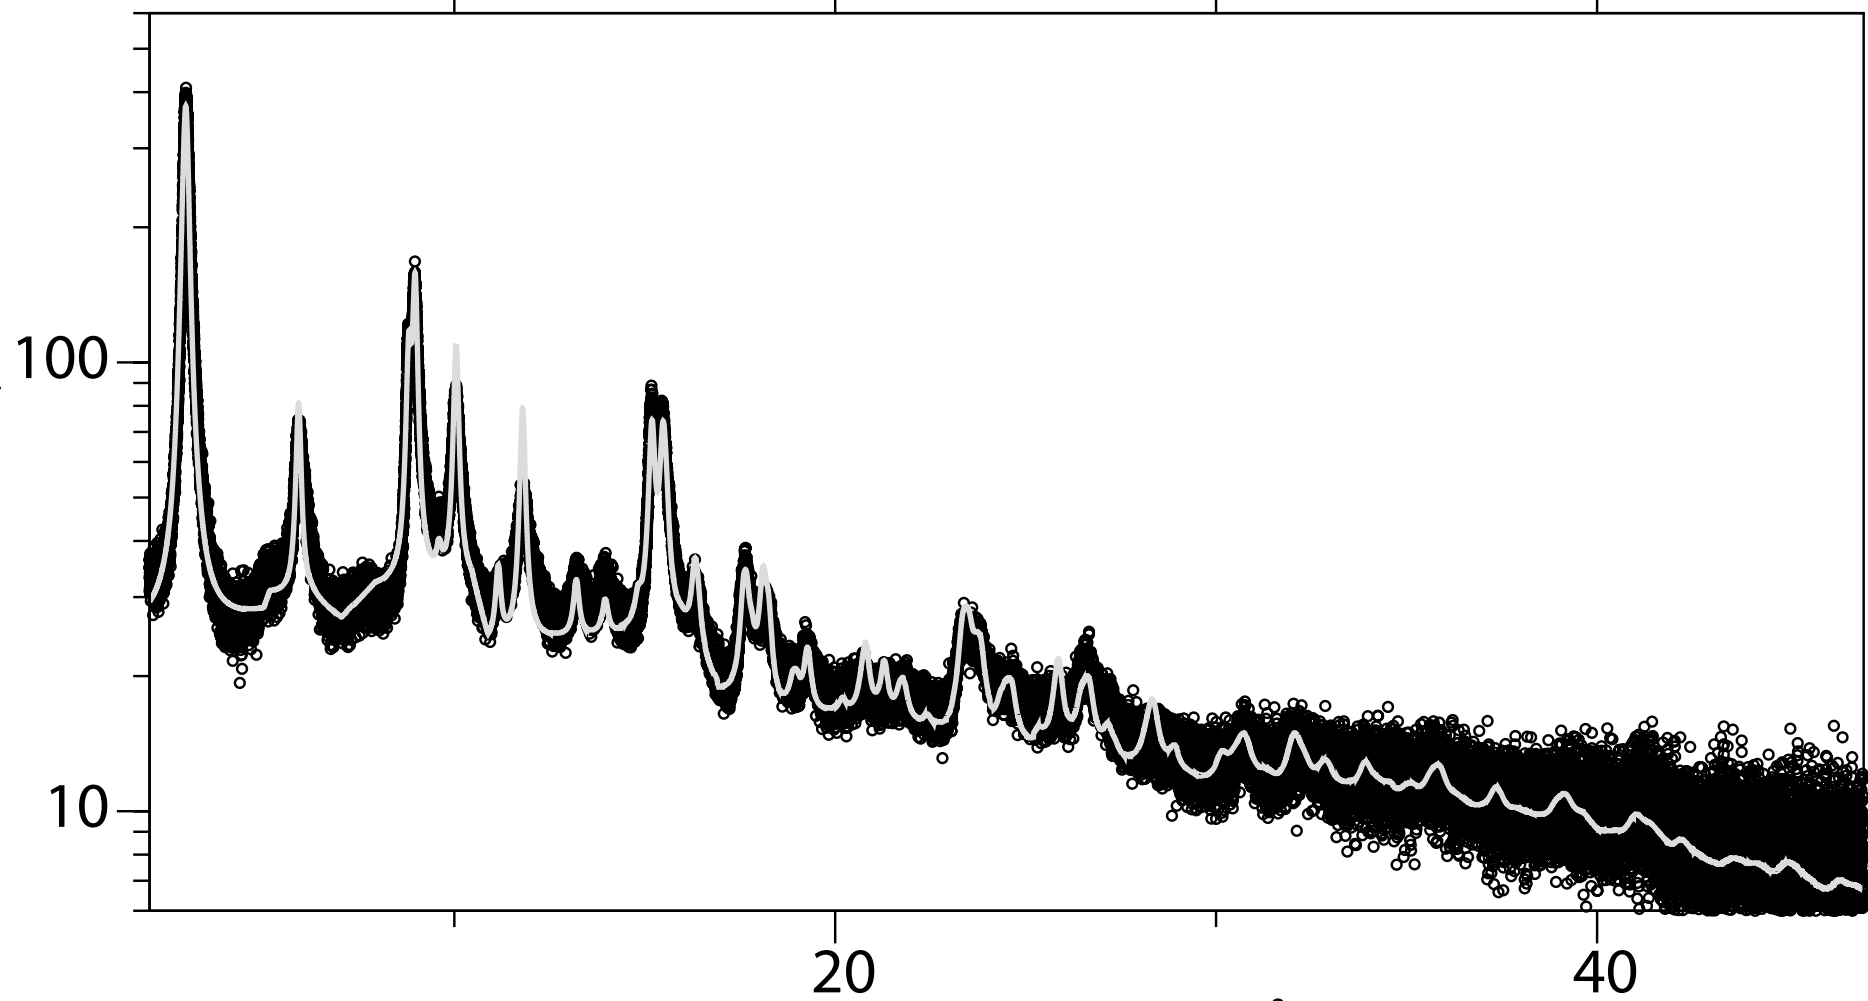

Difference [cts]

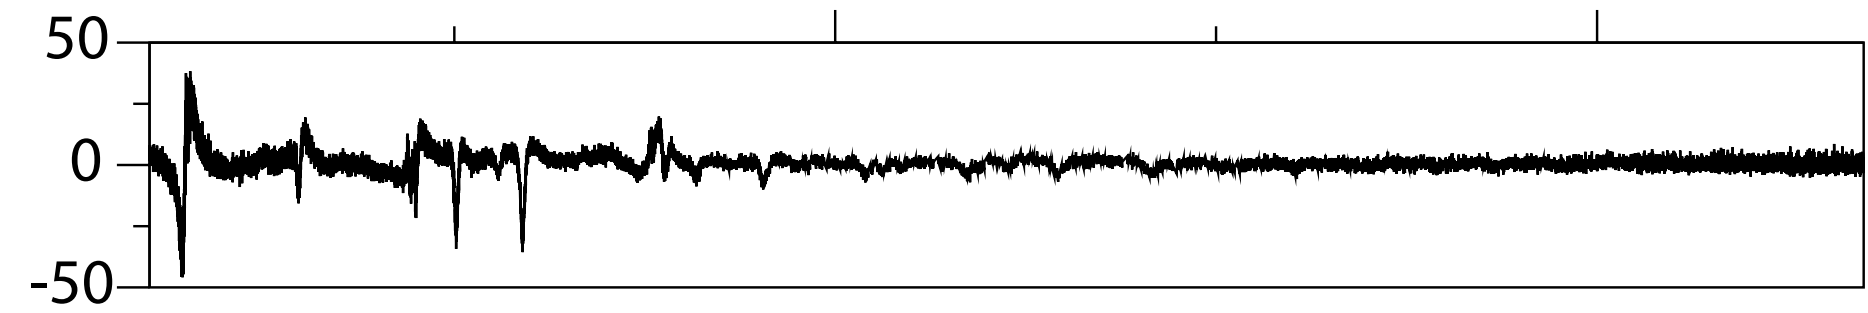

Supplement: Supplementary file 2 [file 4502389]

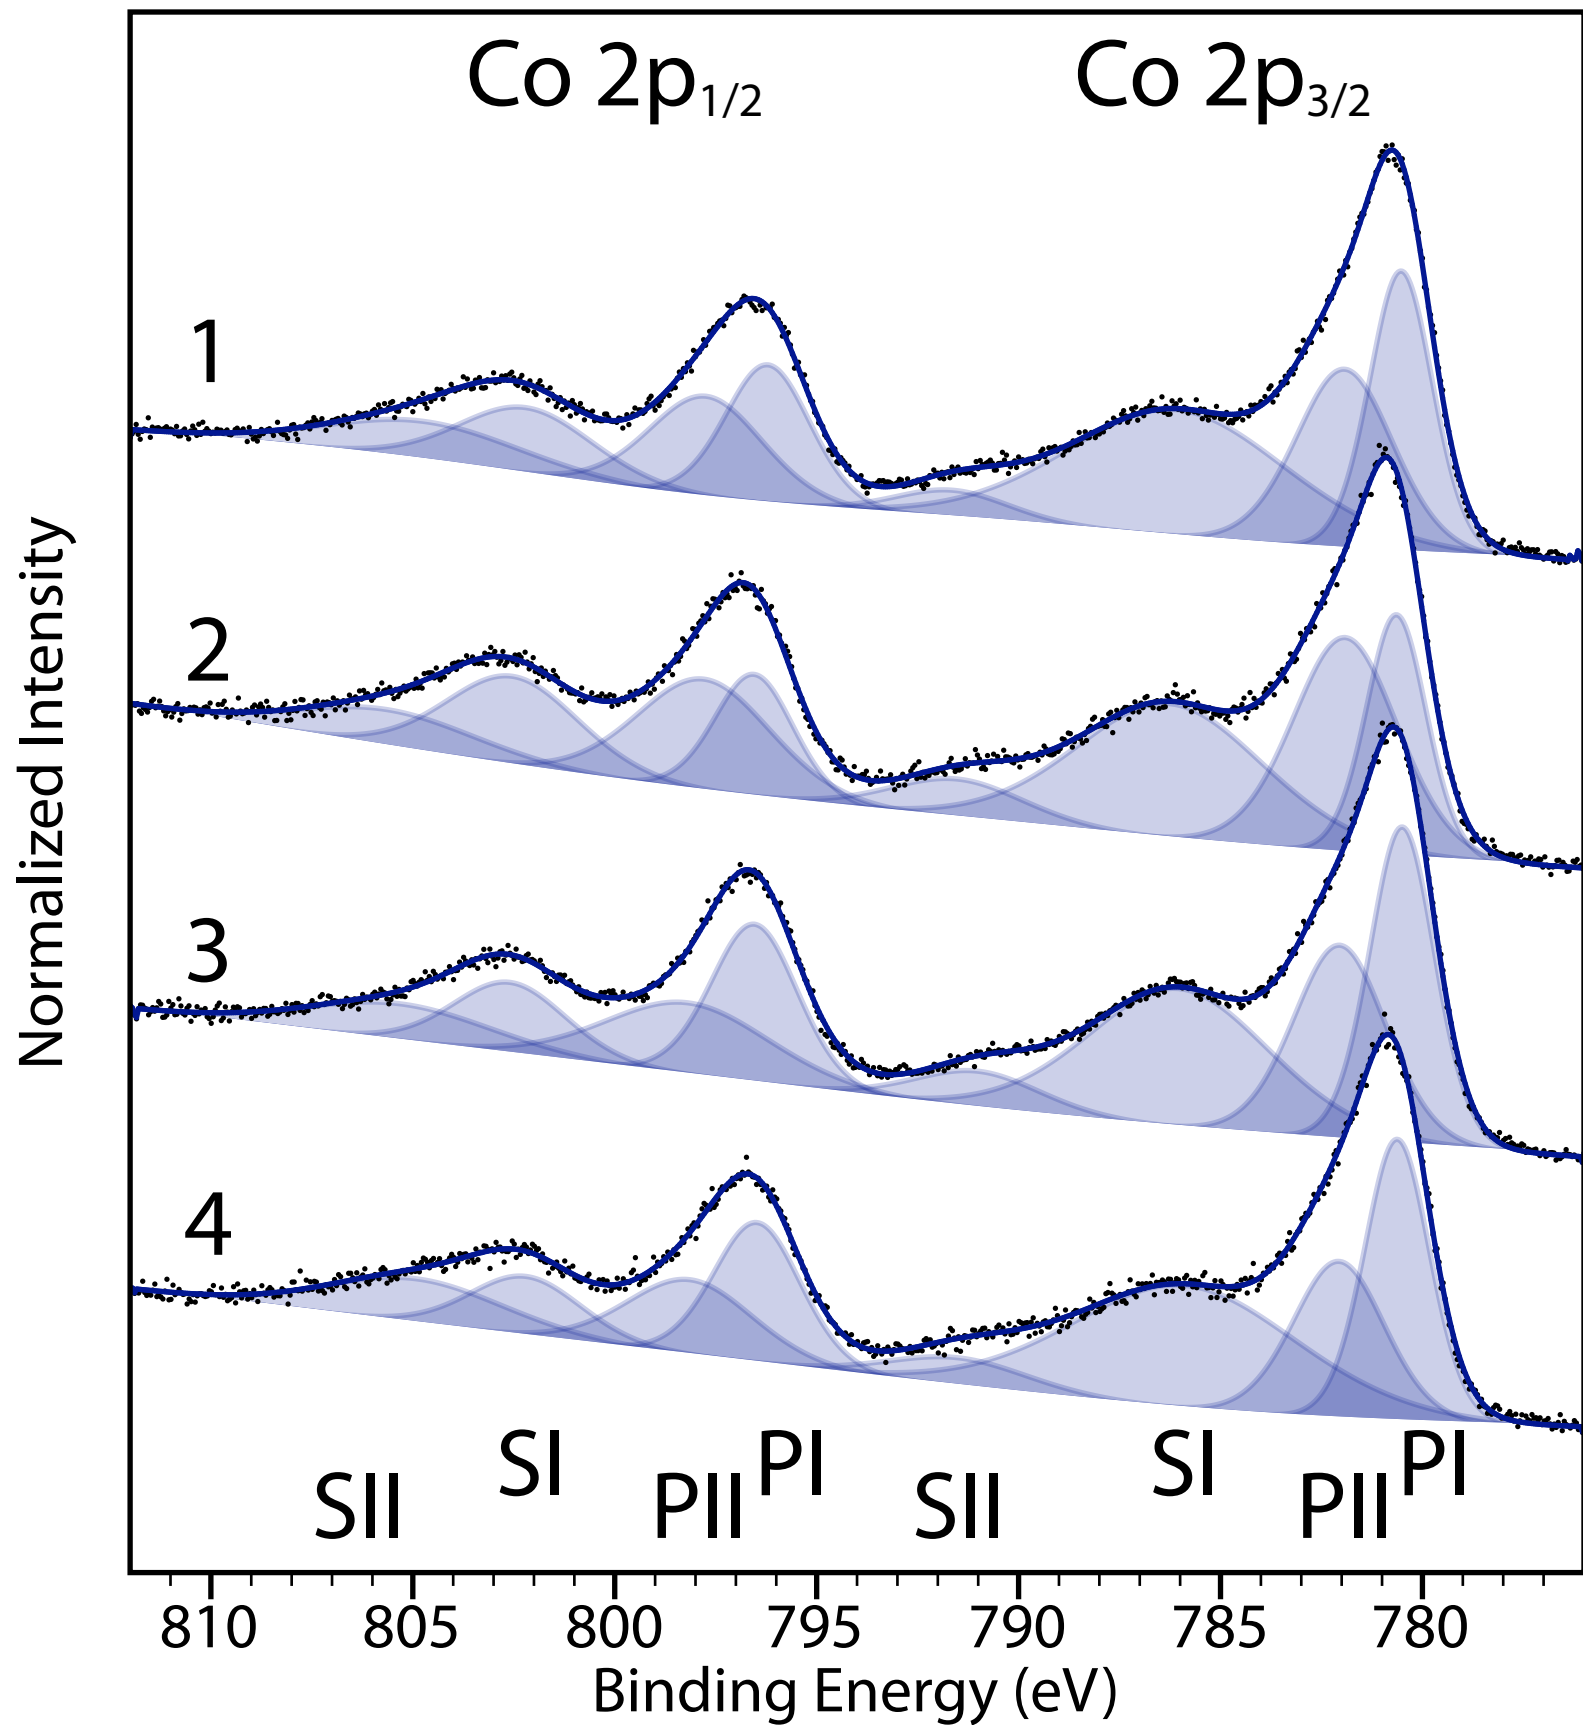

Supplement: Supplementary file 3 [file 4502389]
